# Supplementary material for: Comparison of Clinical Interventions between Student Pharmacists on Advanced Pharmacy Practice Experiences in Indianapolis, Indiana versus Eldoret, Kenya
Source: MDPI journal article supplement (doi:10.3390/pharmacy11030092), 2023-05-30
Supplement: s1 [file s1]

**Table S1. Student Interventions Collection Form** (Student Intervention Data Collection Tool)

Site Name: \_\_\_\_\_ Student Name: \_\_\_\_\_

For the table below only include accepted recommendations

| Date | BP/BS monitoring instructions | Drug info to family or patient | Drug info to healthcare worker | IV administration instructions | Inservice | Consults (see code below) | Medication History | Medication reconciliation | T-sheet or MAR reconciliation |       | Diagnostic and lab testing | Total number of patients |
|------|-------------------------------|--------------------------------|--------------------------------|--------------------------------|-----------|---------------------------|--------------------|---------------------------|-------------------------------|-------|----------------------------|--------------------------|
|      |                               |                                |                                |                                |           |                           |                    |                           | Rewrite                       | Other |                            |                          |
|      |                               |                                |                                |                                |           |                           |                    |                           |                               |       |                            |                          |
|      |                               |                                |                                |                                |           |                           |                    |                           |                               |       |                            |                          |
|      |                               |                                |                                |                                |           |                           |                    |                           |                               |       |                            |                          |
|      |                               |                                |                                |                                |           |                           |                    |                           |                               |       |                            |                          |
|      |                               |                                |                                |                                |           |                           |                    |                           |                               |       |                            |                          |
|      |                               |                                |                                |                                |           |                           |                    |                           |                               |       |                            |                          |

BP/BS=Blood pressure/blood sugar; Consults: A = Anticoagulation; H = HIV; T = Tuberculosis; N = Nutrition; E = Endocrine/Diabetes

Site Name: \_\_\_\_\_

Student Name: \_\_\_\_\_

For the table below only include accepted recommendations

| Date | Drug Acquisition | Appropriate therapy (drug selection, addition, change) | Chart Review | Medication Safety Issue | Contraindication | Dosing | Drug interaction | Duplicate therapy | IV to PO | Pharmaco-vigilance | Total # of consultations |
|------|------------------|--------------------------------------------------------|--------------|-------------------------|------------------|--------|------------------|-------------------|----------|--------------------|--------------------------|
|      |                  |                                                        |              |                         |                  |        |                  |                   |          |                    |                          |
|      |                  |                                                        |              |                         |                  |        |                  |                   |          |                    |                          |
|      |                  |                                                        |              |                         |                  |        |                  |                   |          |                    |                          |
|      |                  |                                                        |              |                         |                  |        |                  |                   |          |                    |                          |
|      |                  |                                                        |              |                         |                  |        |                  |                   |          |                    |                          |

*Adapted from:* Pastakia SD, Vincent WR 3rd, Manji I, Kamau E, Schellhase EM. Clinical pharmacy consultations provided by American and Kenyan pharmacy students during an acute care advanced pharmacy practice experience. *Am J Pharm Educ.* 2011;75(3):42.

Document Activities that address domains 2 & 3 of the Center for Advancement of Pharmacy Education 2013 Educational Outcomes (*Am J Pharm Educ.* 2013;77(8):162)
